# Supplementary material for: Improved participation of older people with joint contractures living in nursing homes: feasibility of study procedures in a cluster-randomised pilot trial
Source: PubMed Central journal article supplement (PMC6617884; doi:10.1186/s13063-019-3522-1), 2019-07-09
Supplement: 13063_2019_3522_MOESM1_ESM.pdf [file 13063_2019_3522_MOESM1_ESM.pdf]

## **Additional file 1**

Supplement to: Saal S<sup>1</sup>, Klingshirn H<sup>1</sup>, Beutner K, Strobl R, Grill E, Müller M<sup>2</sup>, Meyer G<sup>2</sup>.  
Improved participation of older people with joint contractures living in nursing homes:  
Feasibility of study procedures in a cluster-randomised pilot trial.

<sup>1</sup> shared first authorship

<sup>2</sup> shared senior authorship

**Table A1** Problems in participation of residents with joint contractures during the study

| Code <sup>a</sup> / Item |                                   |                  | Intervention group<br>(n=57) |          | Control group<br>(n=52) |          |
|--------------------------|-----------------------------------|------------------|------------------------------|----------|-------------------------|----------|
|                          |                                   |                  | Baseline                     | 6 months | Baseline                | 6 months |
| d660                     | Assisting others                  | No               | 20 (35)                      | 23 (40)  | 14 (27)                 | 17 (33%) |
|                          |                                   | Mild or moderate | 0 (0)                        | 5 (9)    | 4 (8)                   | 3 (6)    |
|                          |                                   | Severe           | 5 (9)                        | 6 (11)   | 5 (10)                  | 3 (6)    |
|                          |                                   | Complete         | 32 (56)                      | 23 (40)  | 29 (56)                 | 28 (55)  |
| d7105                    | Physical contact in relationships | No               | 24 (42)                      | 33 (58)  | 18 (35)                 | 38 (73)  |
|                          |                                   | Mild or moderate | 11 (19)                      | 4 (7)    | 18 (35)                 | 1 (2)    |
|                          |                                   | Severe           | 11 (19)                      | 6 (11)   | 11 (21)                 | 5 (10)   |
|                          |                                   | Complete         | 11 (19)                      | 14 (25)  | 5 (10)                  | 8 (15)   |
| d750                     | Informal social relationships     | No               | 26 (46)                      | 31 (54)  | 17 (33)                 | 28 (54)  |
|                          |                                   | Mild or moderate | 9 (16)                       | 4 (7)    | 20 (38)                 | 3 (6)    |
|                          |                                   | Severe           | 7 (12)                       | 3 (5)    | 6 (12)                  | 5 (10)   |
|                          |                                   | Complete         | 15 (26)                      | 19 (33)  | 9 (17)                  | 16 (31)  |
| d910                     | Community life                    | No               | 22 (39)                      | 26 (46)  | 22 (43)                 | 19 (37)  |
|                          |                                   | Mild or moderate | 8 (14)                       | 4 (7)    | 7 (14)                  | 4 (8)    |
|                          |                                   | Severe           | 16 (28)                      | 5 (9)    | 13 (25)                 | 2 (4)    |
|                          |                                   | Complete         | 11 (19)                      | 21 (38)  | 9 (18)                  | 26 (51)  |
| d9200                    | Playing                           | No               | 22 (39)                      | 35 (61)  | 25 (48)                 | 26 (50)  |
|                          |                                   | Mild or moderate | 11 (19)                      | 1 (2)    | 8 (15)                  | 3 (6)    |
|                          |                                   | Severe           | 10 (18)                      | 3 (5)    | 8 (15)                  | 3 (6)    |
|                          |                                   | Complete         | 14 (25)                      | 18 (32)  | 11 (21)                 | 20 (38)  |
| d9201                    | Sports                            | No               | 17 (30)                      | 26 (46)  | 15 (29)                 | 23 (45)  |
|                          |                                   | Mild or moderate | 11 (19)                      | 4 (7)    | 10 (19)                 | 7 (14)   |
|                          |                                   | Severe           | 15 (26)                      | 10 (18)  | 9 (17)                  | 4 (8)    |
|                          |                                   | Complete         | 14 (25)                      | 17 (30)  | 18 (35)                 | 17 (33)  |
| d9202                    | Arts and culture                  | No               | 20 (35)                      | 28 (49)  | 22 (42)                 | 28 (54)  |
|                          |                                   | Mild or moderate | 5 (9)                        | 5 (9)    | 10 (19)                 | 4 (8)    |
|                          |                                   | Severe           | 12 (21)                      | 4 (7)    | 12 (23)                 | 7 (13)   |
|                          |                                   | Complete         | 20 (35)                      | 20 (35)  | 8 (15)                  | 13 (25)  |
| d9203                    | Crafts                            | No               | 16 (28)                      | 24 (42)  | 17 (33)                 | 19 (37)  |
|                          |                                   | Mild or moderate | 2 (4)                        | 3 (5)    | 7 (13)                  | 0 (0)    |
|                          |                                   | Severe           | 12 (21)                      | 7 (12)   | 6 (12)                  | 8 (15)   |
|                          |                                   | Complete         | 27 (47)                      | 23 (40)  | 22 (42)                 | 25 (48)  |
| d9204                    | Hobbies                           | No               | 15 (26)                      | 26 (46)  | 17 (33)                 | 27 (53)  |
|                          |                                   | Mild or moderate | 5 (9)                        | 4 (7)    | 5 (10)                  | 0 (0)    |
|                          |                                   | Severe           | 10 (18)                      | 5 (9)    | 12 (24)                 | 6 (12)   |

|       |                           |                  |         |         |         |         |
|-------|---------------------------|------------------|---------|---------|---------|---------|
| d9205 | Socializing               | Complete         | 27 (47) | 22 (39) | 17 (33) | 18 (35) |
|       |                           | No               | 19 (33) | 34 (60) | 17 (33) | 31 (60) |
|       |                           | Mild or moderate | 10 (18) | 4 (7)   | 12 (23) | 4 (8)   |
|       |                           | Severe           | 21 (37) | 3 (5)   | 16 (31) | 3 (6)   |
| d930  | Religion and spirituality | Complete         | 7 (12)  | 16 (28) | 7 (13)  | 14 (27) |
|       |                           | No               | 32 (56) | 36 (63) | 47 (90) | 47 (90) |
|       |                           | Mild or moderate | 7 (12)  | 3 (5)   | 3 (6)   | 1 (2)   |
|       |                           | Severe           | 9 (16)  | 4 (7)   | 2 (4)   | 1 (2)   |
|       |                           | Complete         | 9 (16)  | 14 (25) | 0 (0)   | 3 (6)   |

<sup>a</sup> Code in the first column corresponding to the respective category of the International Classification of Functioning, Disability and Health. Values are n (%)

**Table 2** -Resource use due to implementation of the intervention

| <b>Item of resource</b>                | <b>Unit of measure</b> | <b>Unit cost (€)</b> | <b>Total cost (€)</b> | <b>Mean cost per intervention cluster (€)</b> | <b>Source</b>                                                                                                    |
|----------------------------------------|------------------------|----------------------|-----------------------|-----------------------------------------------|------------------------------------------------------------------------------------------------------------------|
| Advertising material/brief information | Item                   | 6.93                 | 865.36                | 123.63                                        | Invoice by the manufacturer                                                                                      |
| Education material                     | Item                   | 9.75                 | 351.12                | 50.16                                         | Invoice by the manufacturer                                                                                      |
| Room rental                            | Hour                   | 12.50                | 553.44                | 79.06                                         | Finance department of the Martin Luther University Halle-Wittenberg and the Ludwig-Maximilians-University Munich |
| Workshop catering                      | Participant            | 20.03                | 388.08                | 55.44                                         | Invoice by the manufacturer                                                                                      |
| Travel expenses                        | Kilometer lump sum     | 0.30                 | 609.30                | 87.04                                         | Finance department of the Martin Luther University Halle-Wittenberg                                              |
| External consultants' fee              | Lump sum               | 3700.00              | 3700.00               | 528.57                                        | Invoice by the Martin Luther University Halle-Wittenberg                                                         |
| Peer mentors' salary                   | Minute                 | 0.32                 | 150.40                | 21.49                                         | Finance department of the Martin Luther University Halle-Wittenberg and the Ludwig-Maximilians-University Munich |
| Investigators' salary (total)          | Hour                   | 24.87                | 1840.64               | 262.95                                        | Finance department of the Martin Luther University Halle-Wittenberg and the Ludwig-Maximilians-University Munich |
| Facilitators' salary (total)           | Hour                   | 23.48                | 3705.16               | 529.31                                        | Finance department of nursing homes                                                                              |
| <b>Sum</b>                             |                        |                      | <b>12163.50</b>       | <b>1756.85</b>                                |                                                                                                                  |

|                             |  |               |  |  |
|-----------------------------|--|---------------|--|--|
| <b>Per resident (n=111)</b> |  | <b>109.58</b> |  |  |
|-----------------------------|--|---------------|--|--|
